# Supplementary material
Source: Royal Society of Chemistry journal article supplement (doi:10.1039/d6dt00653a)
Supplement: d6dt00653a1.pdf [file d6dt00653a1.pdf]

## Supplementary Information

### Active Lattice Oxygen in Co-doped SrTiO<sub>3</sub> on CO Oxidation Based on Mars–van Krevelen Mechanism

Ryosuke Sugimoto,<sup>a</sup> Yuta Odani,<sup>a</sup> Saki Imada,<sup>b</sup> Saburo Hosokawa<sup>\*,a</sup>

<sup>a</sup> Faculty of Materials Science and Engineering, Kyoto Institute of Technology,  
Matsugasaki, Sakyo-ku, Kyoto 606-8585, Japan

<sup>b</sup> Faculty of Electrical Engineering and Electronics, Kyoto Institute of Technology,  
Matsugasaki, Sakyo-ku, Kyoto 606-8585, Japan

**\*Corresponding Author**

E-mail address: hosokawa@kit.ac.jp (S.H.)

**Table S1.** BET surface areas of SrTi<sub>1-x</sub>Co<sub>x</sub>O<sub>3</sub> and Pt/Al<sub>2</sub>O<sub>3</sub>.

| <b>Sample</b>                                          | <b>BET surface area / m<sup>2</sup> g<sup>-1</sup></b> |
|--------------------------------------------------------|--------------------------------------------------------|
| SrTiO <sub>3</sub>                                     | 5                                                      |
| SrTi <sub>0.98</sub> Co <sub>0.02</sub> O <sub>3</sub> | 11                                                     |
| SrTi <sub>0.9</sub> Co <sub>0.1</sub> O <sub>3</sub>   | 4                                                      |
| SrTi <sub>0.8</sub> Co <sub>0.2</sub> O <sub>3</sub>   | 2                                                      |
| SrTi <sub>0.7</sub> Co <sub>0.3</sub> O <sub>3</sub>   | 2                                                      |
| SrTi <sub>0.6</sub> Co <sub>0.4</sub> O <sub>3</sub>   | 2                                                      |
| SrTi <sub>0.4</sub> Co <sub>0.6</sub> O <sub>3</sub>   | 1                                                      |
| SrTi <sub>0.2</sub> Co <sub>0.8</sub> O <sub>3</sub>   | 1                                                      |
| Pt/Al <sub>2</sub> O <sub>3</sub>                      | 105                                                    |

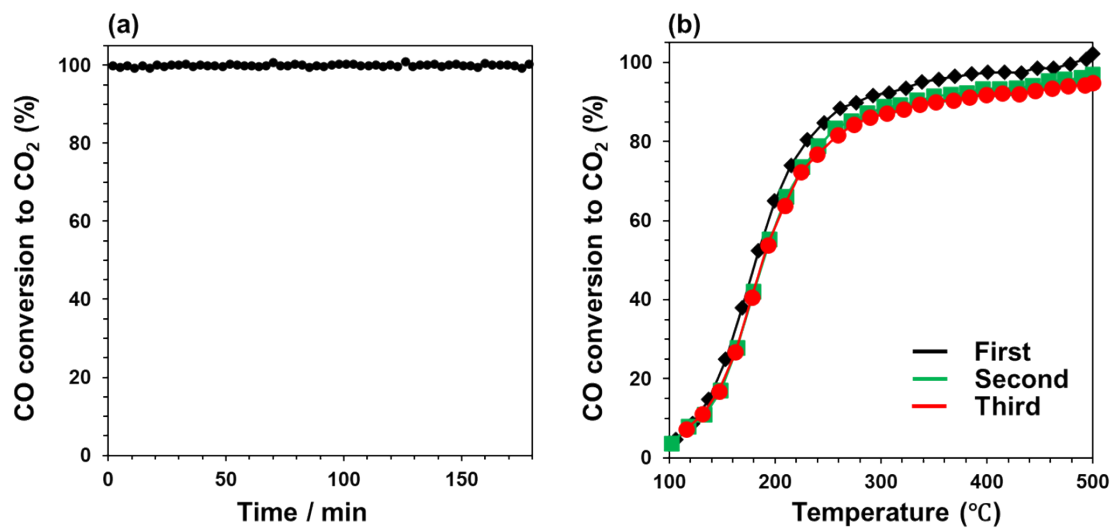

**Figure S1.** Results of the (a) durability test at 300°C and (b) cycling stability tests of CO oxidation over SrTi<sub>0.8</sub>Co<sub>0.2</sub>O<sub>3</sub>.

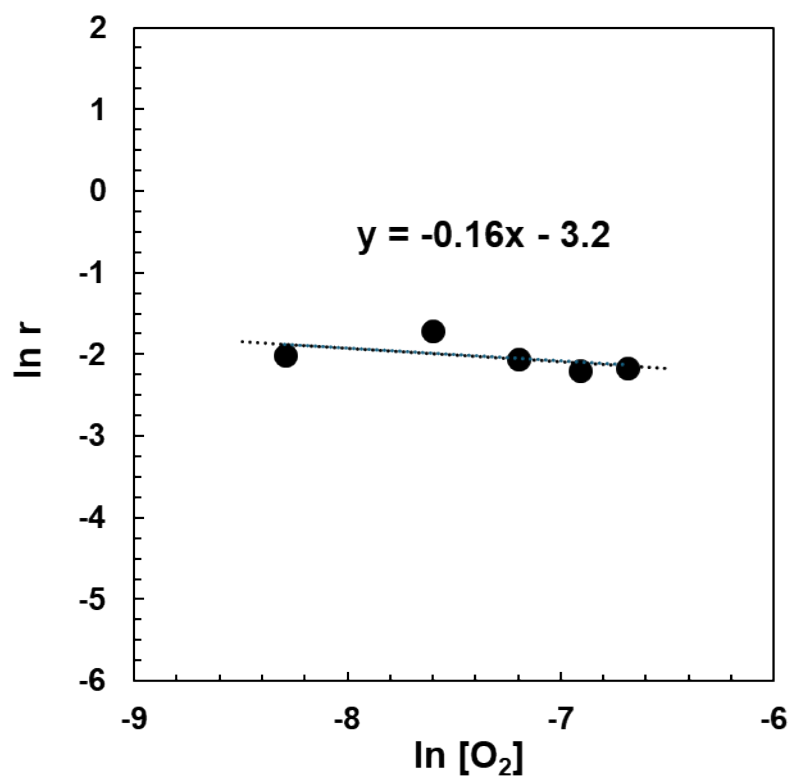

**Figure S2.** Reaction order on the SrTi<sub>0.2</sub>Co<sub>0.8</sub>O<sub>3</sub> catalyst with respect to oxygen partial pressure.

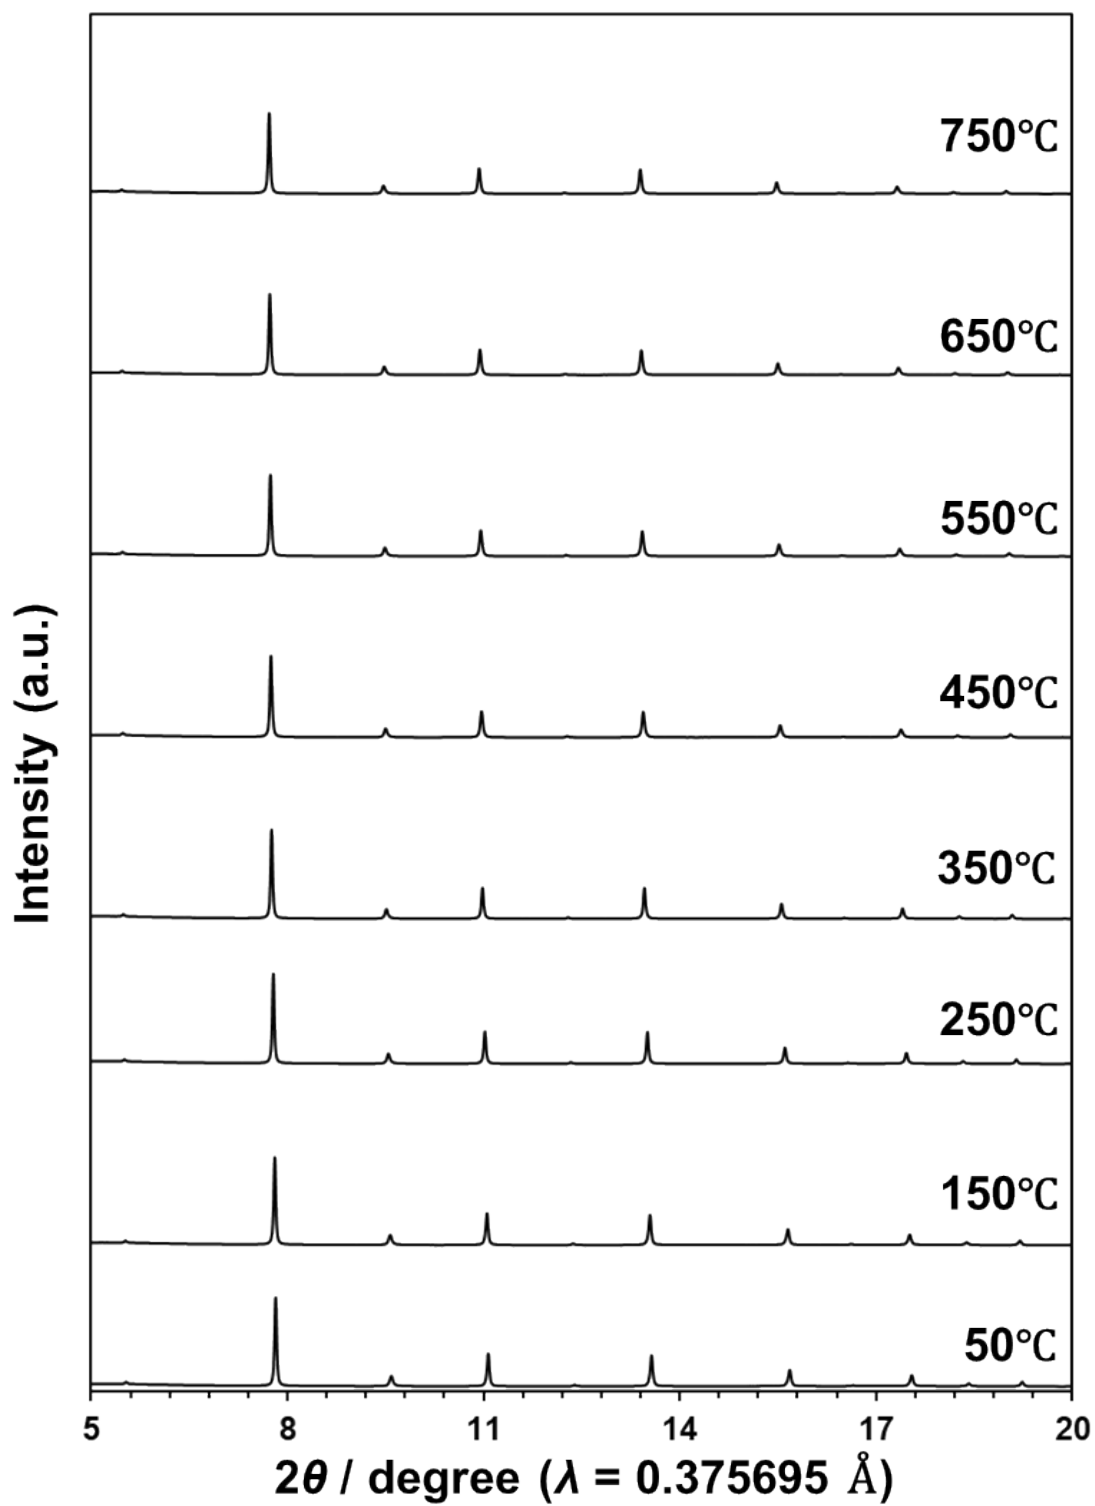

**Figure S3.** *In situ* two-dimensional XRD patterns of SrTi<sub>0.8</sub>Co<sub>0.2</sub>O<sub>3</sub> in an H<sub>2</sub> atmosphere.

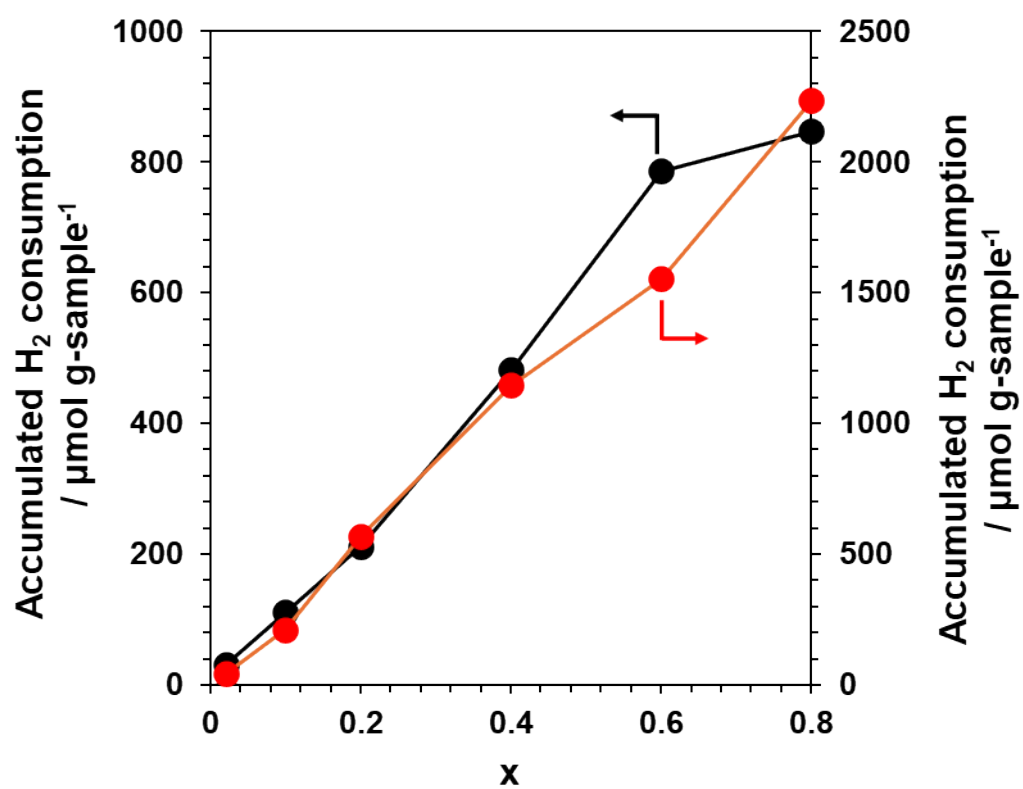

**Figure S4.** Accumulated H<sub>2</sub> consumption for SrTi<sub>1-x</sub>Co<sub>x</sub>O<sub>3</sub> (x = 0.02, 0.1, 0.2, 0.3, 0.4, 0.5, 0.6 and 0.8) at reduction peak (i) (black) and reduction peak (ii) (red).

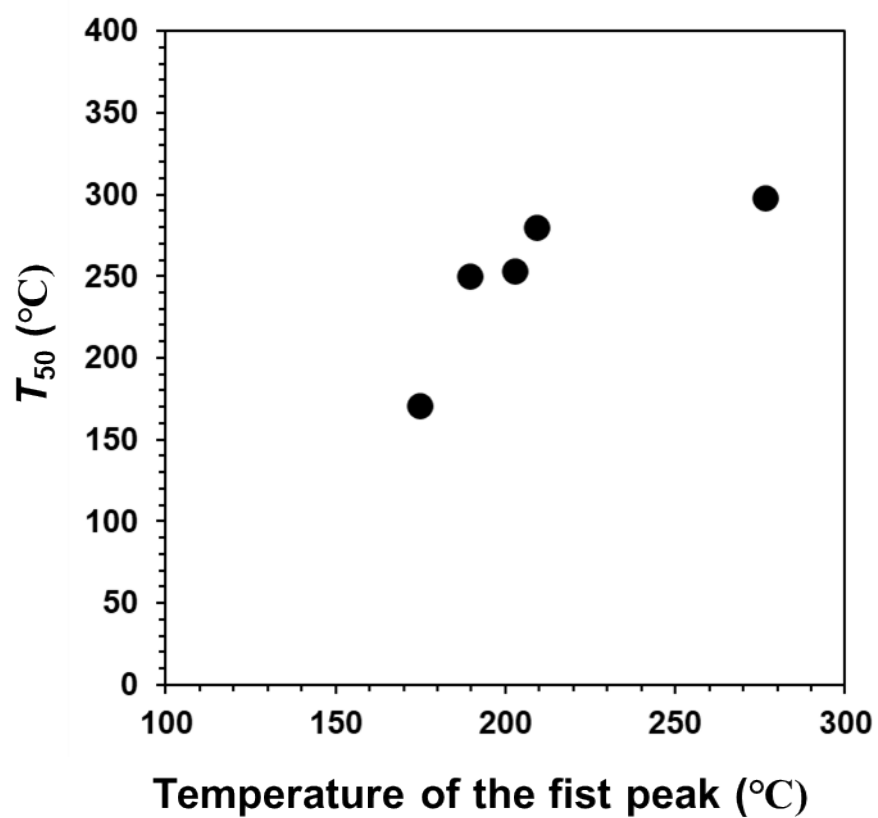

**Figure S5.** Relationship between the temperature of the first peak in H<sub>2</sub>-TPR and T<sub>50</sub>.

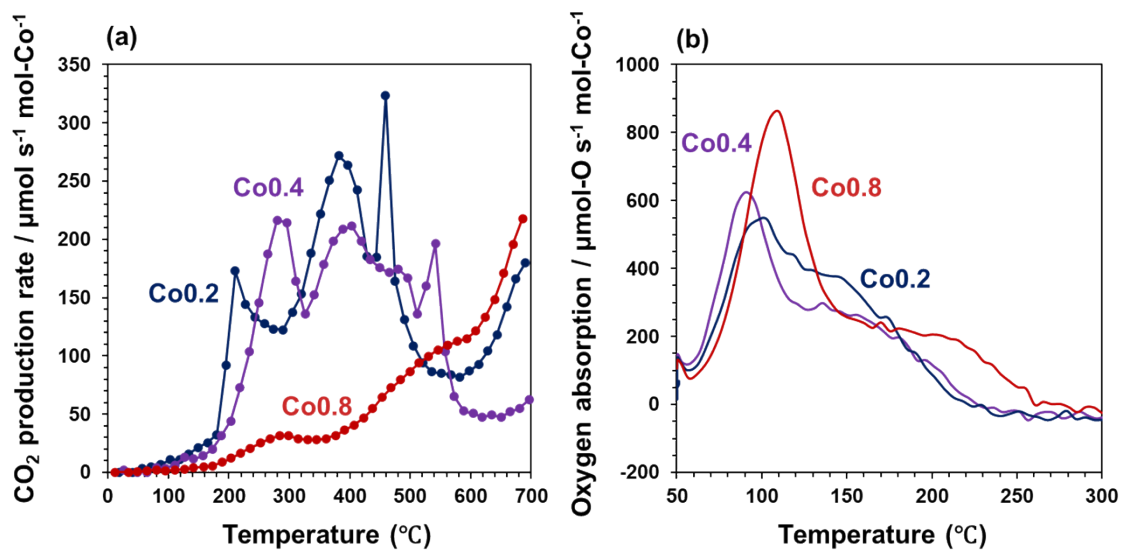

Figure S6. (a) CO-TPR and (b) O<sub>2</sub>-TPO over SrTi<sub>1-x</sub>Co<sub>x</sub>O<sub>3</sub> (x = 0.2, 0.4, and 0.8).

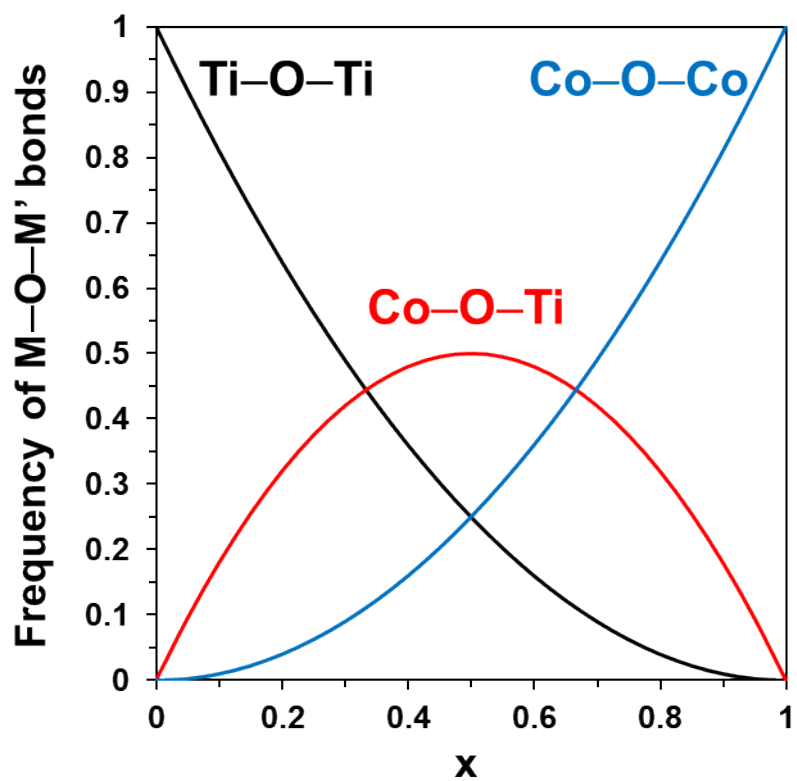

**Figure S7.** Estimated relative frequencies of M–O–M' bonds based on statistical analysis. Relative frequencies of the Co–O–Co, Ti–O–Ti, and Co–O–Ti bonds are calculated assuming that Co and Ti occupy the B site with probabilities of  $x$  and  $1-x$ , respectively, resulting in frequencies given by  $x^2$ ,  $(1-x)^2$ , and  $2x(1-x)$ , respectively.

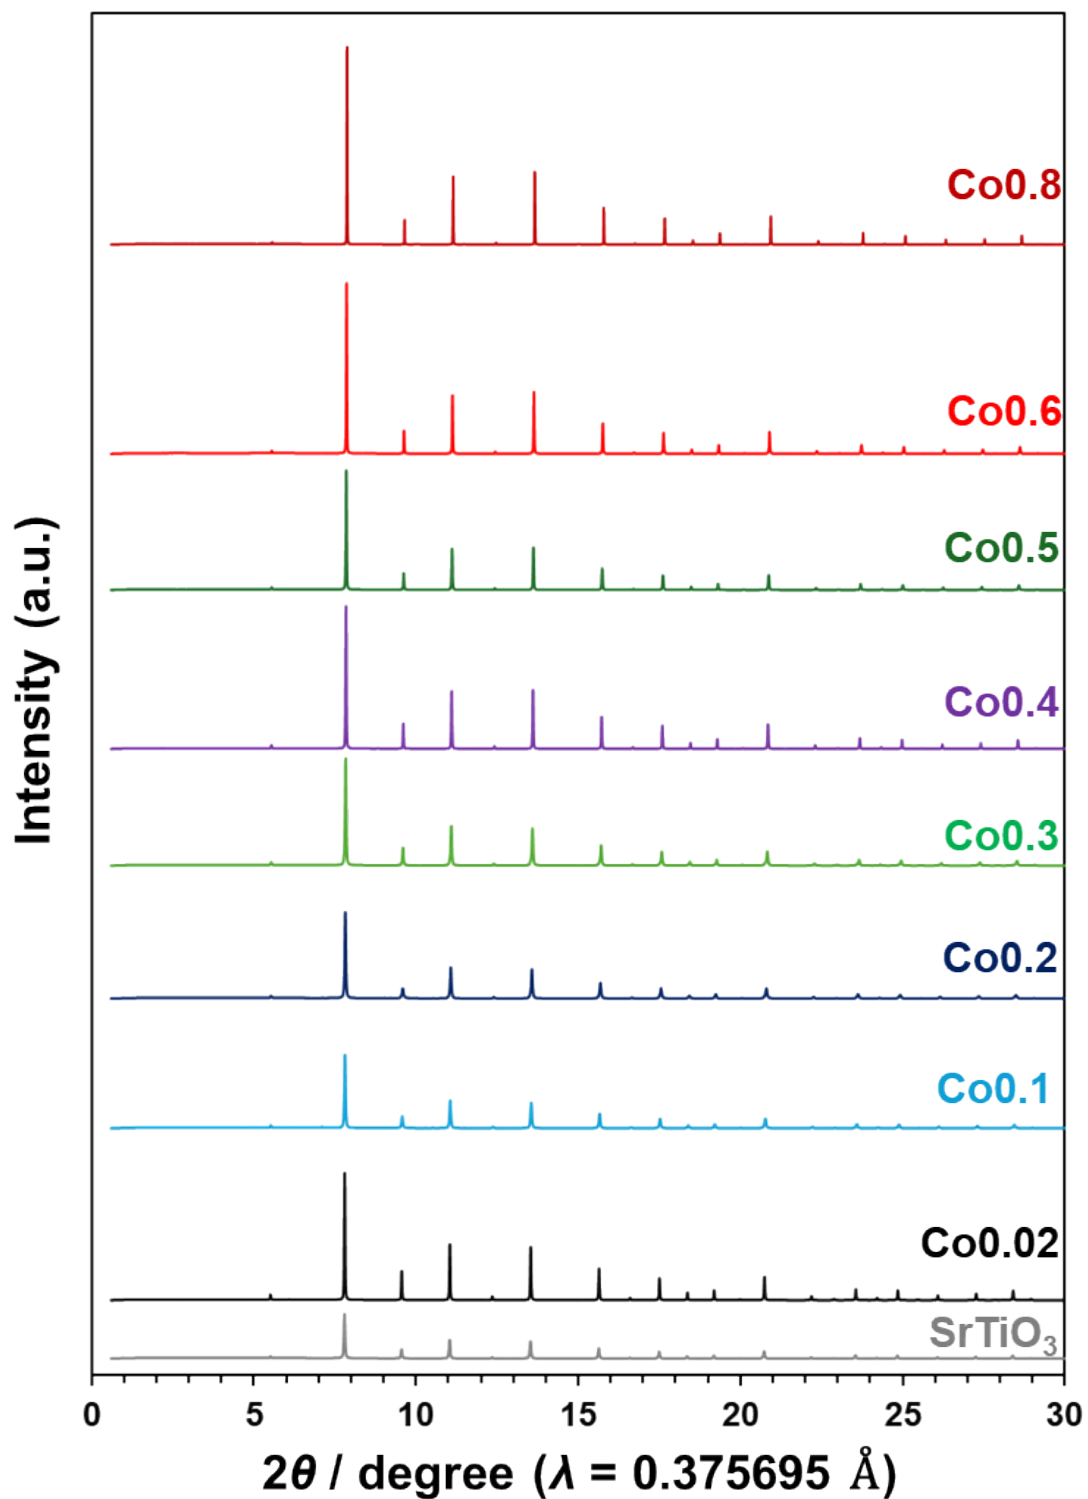

**Figure S8.** Synchrotron XRD patterns at room temperature of SrTi<sub>1-x</sub>Co<sub>x</sub>O<sub>3</sub> (x = 0, 0.02, 0.1, 0.2, 0.3, 0.4, 0.5, 0.6 and 0.8).

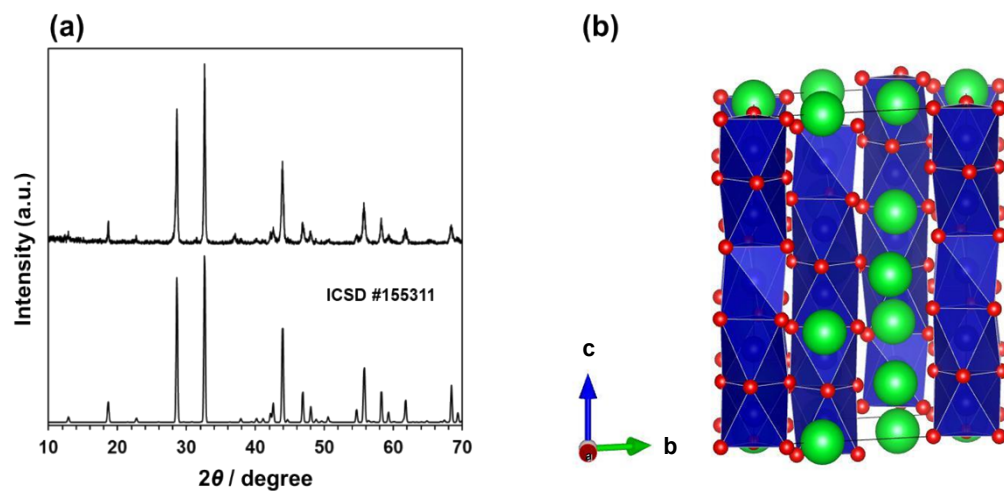

**Figure S9.** (a) XRD patterns and (b) crystal structure of  $\text{Sr}_6\text{Co}_5\text{O}_{15}$ .

**Table S2.** Results of Le Bail refinement of SrTi<sub>1-x</sub>Co<sub>x</sub>O<sub>3</sub>.

| <b>x</b>    | <b>a (Å)</b>      | <b>R<sub>wp</sub></b> |
|-------------|-------------------|-----------------------|
| <b>0</b>    | <b>3.90557(2)</b> | <b>3.92</b>           |
| <b>0.02</b> | <b>3.90370(1)</b> | <b>3.88</b>           |
| <b>0.05</b> | <b>3.90152(2)</b> | <b>3.80</b>           |
| <b>0.1</b>  | <b>3.89885(4)</b> | <b>6.06</b>           |
| <b>0.2</b>  | <b>3.89260(6)</b> | <b>8.69</b>           |
| <b>0.3</b>  | <b>3.88781(7)</b> | <b>9.70</b>           |
| <b>0.4</b>  | <b>3.88366(2)</b> | <b>5.12</b>           |
| <b>0.5</b>  | <b>3.87981(2)</b> | <b>4.74</b>           |
| <b>0.6</b>  | <b>3.87531(3)</b> | <b>5.94</b>           |
| <b>0.8</b>  | <b>3.86769(1)</b> | <b>6.85</b>           |

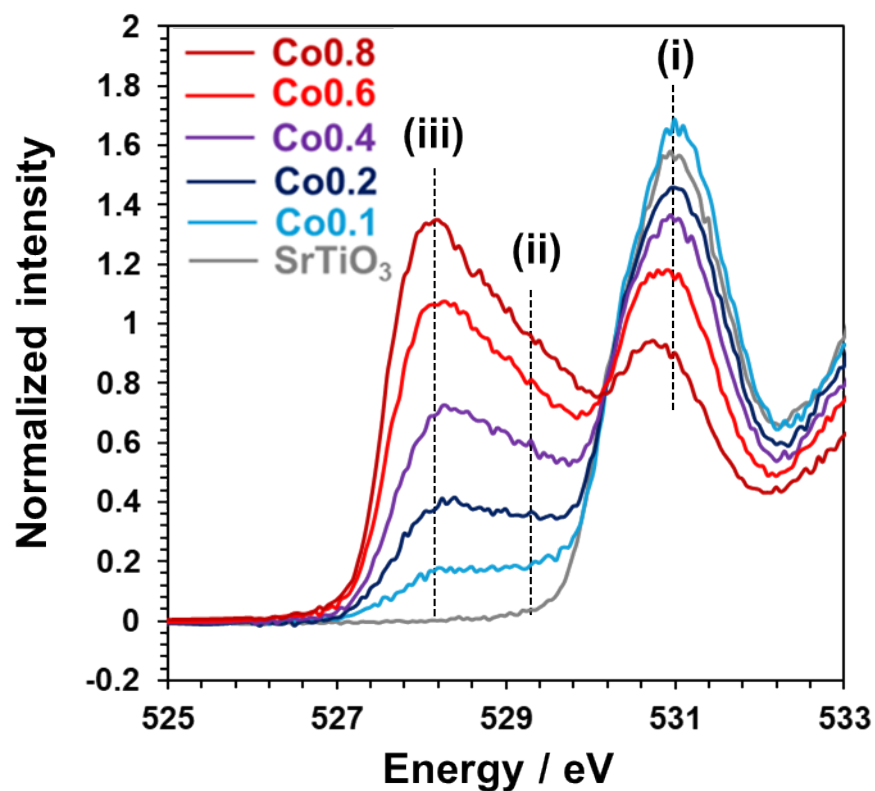

**Figure S10.** Magnified O *K*-edge XAS of  $\text{SrTi}_{1-x}\text{Co}_x\text{O}_3$  ( $x = 0, 0.1, 0.2, 0.4, 0.6, 0.8$ ) obtained in the PFY mode. Peaks (i) and (ii) show Ti  $3d\ t_{2g}$ -O  $2p$  hybridized states and Co  $3d_{yz}/\text{Co } 3d_{x^2-y^2}$ -O  $2p$  hybridized states, respectively.<sup>29-31</sup> Peak (iii) shows the O  $2p$  ligand hole and Co  $3d_{xy}/\text{Co } 3d_{xz}$ -O  $2p$  hybridized states.<sup>31</sup>
